# Supplementary material
Source: Research Square preprint supplement (doi:10.21203/rs.3.rs-9847128/v1)
Supplement: Supplementary file 1 [file 27edb705325e3c86b5e819c1.docx]

**Table 1. Patients clinical characteristics and cancer-free women socio-demographic characteristics**

|  | **Sex-cord stromal tumors survivors**  **n = 45** | | | **Germ cell tumors survivors**  **n =99** | | |
| --- | --- | --- | --- | --- | --- | --- |
| **Patients clinical characteristics** | | | | | | |
| **Age at diagnosis (years)**  Median [Min, Max] | 36.4 [4.75-64.7] | | | 23.3 [10.7-53.5] | | |
| **Time since end of chemotherapy (years)**  Median [IQR] | 5.16 [2.56-8.62] | | | 5.78 [3.46-9.03] | | |
| **Menopausal status**  - At study inclusion (n (%))  - Age at menopause (years)  Median (min-max) | 32 (73%)  45 (18.0-57.0) | | | 25 (27%)  36 (12.0-52.0) | | |
| **Most frequent comorbidities** a (n (%))  - Hypertension  - Diabete | 6 (14%)  6 (14%) | | | 6 (6%)  0 (0%) | | |
| **FIGO stages** (n (%))  - Stage I/II  - Stage III/IV  - Unknown | 28 (62 %)  9 (20 %)  8 (18%) | | | 48 (49 %)  30 (30 %)  21 (21%) | | |
| **SURGERY** (n (%)) |  | | |  | | |
| **Primary Surgery**  - conservative surgery  - non-conservative surgery  - no initial surgery | 29 (64%)  14 (31)  2 (4%) | | | 77 (78 %)  19 (19 %)  3 (3 %) | | |
| **Second surgery at relapse**  **-** conservative surgery  - non-conservative surgery  - no second surgery | 0  24 (53%)  21 (47%) | | | 13 (13 %)  23 (23 %)  63 (64 %) | | |
| **CHEMOTHERAPY** (n (%)) |  | | |  | | |
| - Chemotherapy at primary diagnosis  - Relapse treated with chemotherapy | 30 (67 %)  20 (45 %) | | | 89 (90 %)  13 (14 %) | | |
| - **Type of chemotherapy** .bleomycin/etoposide/cisplatin  . Otherb | 40 (89 %)  5 (11 %) | | | 98 (99 %)  1 (1 %) | | |
| - **Lines of chemotherapy**  . 1 line  . 2 linesc | 40 (89%)  5 (11%) | | | 95 (96%)  4 (4%) | | |
| **Patients and cancer-free women socio-demographic characteristics at the time of the survey** | | | | | | |
|  | **Sex-cord stromal tumors patients**  **n=45** | **Matched cancer-free women**  **n=86** | **p value** | **Germ cell tumors patients**  **n=99** | **Matched cancer-free women**  **n=198** | **p value** |
| **Age (years)**  Median [Min, Max] | 50.6 [21-71] | 50 [21-71] | 0.7 | 33 [19-63] | 33 [18-63] | 0.83 |
| **Education Level** (n (%))  Primary/Middle school  Secondary school/BAC  Higher education | 16 (36%)  12 (27%)  17 (38%) | 16 (19 %)   | 25 (29%) | | --- |   45 (52 %) | 0.09 | 14 (14 %)  22 (22 %)  63 (64 %) | 17 (9 %)  54 (27 %)  127 (64 %) | 0.27 |
| **Body Mass Index (Kg/m²)**  Median [Min, Max]  BMI Category, n (%)d  - BMI<25  - 25≥BMI<30  - BMI≥30 | 25.0  [17.7-40.5]  23 (51 %)  15 (33 %)  7 (16 %) | 23.0  [16.3-36.3]  61 (71 %)  16 (19 %)  9 (10 %) | **0.009** | 22.9  [16.4-40.4]  57 (58 %)  24 (24 %)  17 (17 %) | 23.1  [15.6-40.2]  132 (67 %)  42 (21 %)  24 (12 %) | 0.61 |
| **Menopausal status**  - At study inclusion (n (%))  - Age at menopause  (Median [Min, Max]) | 32 (73%)  45 [18-57] | 38 (44 %)  50 [33-55] | **0.004**  **0.001** | 25 (27 %)  36 [12-52] | 11 (6 %)  50 [45-54] | **<0.001**  **<0.001** |

Bold P values indicates statistical significance.

a- Missing: 2 in sex-cord stromal tumors patients and 1 in germ cell tumor patients

b- Some patients did not receive BEP (or EP) at any line of treatment. For these patients, other chemotherapy was: carboplatin + paclitaxel (n=3), carboplatin monotherapy (n=1), VeIP (Vinblastine, ifosfamide, and cisplatin) (n=2).

c- Detailed chemotherapy regimen for relapsed patients treated with 2 lines are available in table S1.

d- Missing data for 1 germ cell tumor patient

**Table 2. Differences in quality of life between patients treated with surgery and chemotherapy and matched cancer-free women**

|  | **Sex-cord stromal tumors patients**  **n= 45** | **Matched cancer-free women**  **n=86** | **p value** | **∆scores in quality of life**  **(%)** | **Germ cell tumors patients**  **n=99** | **Matched cancer-free woman**  **n=198** | **p value** | **∆scores in quality of life (%)** |
| --- | --- | --- | --- | --- | --- | --- | --- | --- |
| **Fatigue** (MFI20, median [min-max])a  **. General fatigue**  **. Reduced activity**  **. Reduced motivation**  **. Mental fatigue** | 52 [26.0-82.0]  27 [14-39]  6 [3-15]  4 [2-10]  15 [6-25] | 42.5 [24.0-86.0]  22 [13-42]  5.5 [3-13]  3 [2-10]  10 [6-29] | **0.03**  **0.02**  0.08  0.23  0.102 | **11.8**  **13.8**  4.1  12.5  20.8 | 47 [24.0-83.0]  24 [13-42]  5 [3-15]  3 [2-8]  12 [6-28] | 43.5 [24.0-91.0]  23.5 [13-42]  5 [3-15]  3 [2-10]  12 [6-29] | 0.88  0.65  0.9  0.44  0.91 | 4.4  1.4  0  0  0 |
| **Quality of life** (FACT-G)b Total score  Mean (SD)  **. Physical well-being**  **. Social well-being**  **. Emotional well-being**  **. Functional well-being** | 78.7 (14.6)  22.2 (4.40)  20.3 (5.22)  17.3 (4.35)  18.9 (4.91) | 80.9 (13.4)  24.9 (3.10)  18.1 (5.33)  18.5 (4.62)  19.4 (5.50) | 0.40  **<0.001**  0.03  0.141  0.616 | -2  -2.4  2  -1.1  -0.4 | 82.3 (15.7)  23.7 (4.07)  21.0 (5.61)  17.3 (4.57)  20.3 (5.22) | 78.3 (15.3)  23.7 (4.43)  18.5 (5.19)  16.9 (5.19)  19.2 (5.08) | **0.04**  0.99  **<0.001**  0.53  0.08 | 3.6  0.9  2.3  0.4  1 |
| **Ovarian Cancer Subscale**c  Mean (SD) | 31.9 (4.96) | 34.4 (5.02) | **0.008** | **-5.2** | 33.5 (5.36) | 34.7 (4.66) | **0.05** | -2.5 |
| **Cognition Impairment**  **. Cog PCI Score**d, median (min-max)  **. Cognitive complaint**, n (%) | 14 (1-16)  9 (20%) | 15 (3-160)  13 (15%) | 0.07  0.64 | -1.9  NA | 12 (0-16)  37 (37%) | 15 (0-16)  40 (20%) | **0.001**  **0.002** | **-5.7**  NA |
| **Neuropathy**  **. FACT/GOG-NTX Subscale**e, median (min-max)  **. Severe neuropathy** (FACT/GOG-NTX Subscale score <33) | 74 (39-97.8)  16 (36%) | 80.1 (2.0-97.8)  6 (7%) | **0.004**  **<0.001** | -4  NA | 80 (45-10)  16 (16%) | 79.8 (40-100)  18 (9%) | 0.9  0.09 | 1.3  NA |
| **Insomnia**  **. ISI score**f, median (min-max)  **. Moderate / severe insomnia** (ISI score ≥15) | 12 (0-27)  11 (24%) | 8 (0-24)  16 (19%) | 0.17  0.58 | NA  NA | 10 (0-25)  32 (32%) | 9 (0-25)  48 (24%) | 0.7  0.28 | NA  NA |
| **Emotional status** (HADS)g, n (%)  **. Anxiety** (score ≥ 11)  **. Depression** (score ≥ 11) | 19 (42 %)  7 (16 %) | 21 (24 %)  16 (19 %) | 0.06  0.85 | NA  NA | 34 (35 %)  6 (6%) | 60 (30 %)  16 (18 %) | 0.53  0.71 | NA  NA |
| **Physical activity** (IPAQ)h, n (%)  **- High**  **- Moderate**  **- Low** | 8 (22%)  18 (50%)  10 (28%) | 24 (28%)  41 (48%)  21 (24%) | 0.79 | NA | 26 (28%)  42 (45%)  25 (27%) | 41 (21%)  100 (51%)  57 (29%) | 0.39 | NA |
| **Sexual and fertility concerns**i  **- Quality of life** (FACT-O) items  . Less interest in sex  . Afraid not having children  **- Changes in sex life after cancer treatment**  . Not concerned  . No  . Yes, more fulfilling  . Yes, less fulfilling  . Other  . Missing | 17 (39%)  7 (18%)  7 (17 %)  8 (19 %)  4 (10 %)  20 (48 %)  3 (7 %)  3 (7%) | 19 (22%)  8 (17%)  5 (6 %)  41 (48 %)  14 (16 %)  24 (28 %)  2 (2 %)  0 (0%) | 0.09  0.53  **0.004** | NA  NA  NA  NA  NA  NA  NA  NA | 28 (29%)  47 (49%)  23 (23 %)  26 (27 %)  17 (17 %)  28 (29 %)  4 (4 %)  1 (1%) | 24 (12%)  33 (23%)  13 (7 %)  75 (38 %)  60 (30 %)  46 (23 %)  4 (2 %)  0 (0%) | **<0.001**  **<0.001**  **<0.001** | NA  NA  NA  NA  NA  NA  NA  NA |

Bold P values indicate statistical significance. Bold ∆QoL scores indicate clinical significance.

QoL assessments: Higher scores indicate better functioning for the global health scale or functioning scales, while higher symptom scores reflect increased symptom severity.

a-Long-term fatigue was measured using the 20-items Multidimensional Fatigue Inventory: MFI-20 (20 items / maximal score 100).

b-Global QoL was assessed using the General Functional Assessment of Cancer Therapy (FACT-G) scale (27 items / maximal score 108), which assess the effects of cancer therapy on patients in four major domains: physical well-being (PWB), social/family well-being (SWB), emotional well-being (EWB), and functional well-being (FWB).

c- EOC-related symptoms were measured using the ovarian cancer-specific 12-item subscale Functional Assessment of Cancer Therapy: Ovarian subscale (FACT-O: 12 items/ maximal score 48).

d- Cognitive impairment was measured using the FACT-Cognitive Function (Perceived Cognitive Impairments Subscale: 13 items / maximal score 52).

e-Neurotoxicity was measured using the 11-item Functional Assessment of Cancer Therapy/ Gynecologic Oncology Group–Neurotoxicity subscale (FACT/GOG-Ntx + additional concerns of 11 items / maximal score 152).

f- Sleep disturbance was assessed using the 7-item Insomnia Severity Index (ISI) which evaluates the nature, severity and impact of insomnia in the past month.

g-Anxiety and depression were assessed using the 14-item Hospital Anxiety and Depression Scale (HADS).

h-Physical Activity was measured with the 7-item International Physical Activity Questionnaire (IPAQ), which assesses the daily level of physical activity (high, moderate, and low).

i- Sexual disorders were assessed with item BL4 and BMT7 of the FACT-O subscale “I am interested in sex” and “I am afraid not having children » and with a specific questionnaire adapted from the “living conditions” questionnaire used in previous surveys: Patients were asked whether their couple’s relationship and sex life had changed before and after their cancer diagnosis, whereas CFW were asked whether their couple’s relationship and sex life had changed between three years earlier and the time of the study.

**Table 3. Risk factors for fatigue and neuropathy in sex-cord stromal tumors patients and cancer-free women, univariate and multivariate analysis.**

|  | **FATIGUE** | | | | | | | **NEUROPATHY** | | | | | |
| --- | --- | --- | --- | --- | --- | --- | --- | --- | --- | --- | --- | --- | --- |
| **Univariate analysis** | | | | **Multivariate analysis** | | | **Univariate analysis** | | | **Multivariate analysis** | | |
| **Characteristic** | N | BETA | 95%CI | P value | BETA | 95%CI | P value | BETA | 95%CI | P value | BETA | 95%CI | P value |
| AGE | 131 | -0.01 | -0.09, 0.07 | 0.82 | -0.01 | -0.08, 0.06 | 0.79 | 1.00 | 0.97,1.04 | 0.87 | 1.00 | 0.96, 1.05 | 0.93 |
| EDUCATION LEVEL  . Primary/Middle school  . Secondary school/BAC  . Higher education | 131  -  -  - | -  -  -0.81  -0.93 | -  -  -4.1, 2.5  -3.9, 2.1 | -  -  0.63  0.54 | -  -  -2.0  -0.16 | -  -  -5.0,1.0  -2.8,2.4 | -  -  0.20  0.90 | -  -  0.99  0.45 | -  -  0.31,3.18  0.14,1.46 | -  -  0.98  0.18 | -  -  2.30  0.90 | -  -  0.47, 12.5  0.20, 4.23 | -  -  0.31  0.90 |
| POPULATION GROUPS  . Cancer-free women  . Sex-cord stromal tumors Patients | 131  -  - | -  -  2.9 | -  -  0.46, 5.4 | -  -  **0.021** | -  -  -0.54 | -  -  -3.0,1.9 | -  -  0.67 | -  -  7.36 | -  -  2.75,22.2 | -  -  **<0.001** | -  -  7.96 | -  -  2.42, 31.7 | -  -  **<0.001** |
| BMI  . BMI<25  . 25≥ BMI<30  . BMI≥ 30 | 131  -  -  - | -  5.5  4.5 | -  2.8, 8.2  0.97, 8.0 | **-**  **<0.001**  **0.013** | -  3.6  3.4 | -  1.1,6.1  0.16,6.6 | **-**  **0.005**  **0.04** | **-**  3.41  2.78 | -  1.20, 9.79  0.67, 10.1 | **-**  **0.021**  0.13 | -  1.67  2.21 | -  0.41, 6.68  0.39, 11.7 | -  0.47  0.35 |
| FIGO Stage  . I  . II  . III/IV  . Unknown | 45  -  -  -  - | -  -  1.2  -0.79  -1.2 | -  -  -6.3, 8.7  -6.2, 4.6  -6.8, 4.5 | -  -  0.75  0.77  0.68 | **-**  -  -  -  - | **-**  -  -  -  - | **-**  -  -  -  - | -  -  1.67  1.33  0.24 | **-**  -  0.17, 16.0  0.27, 6.40  0.01, 1.67 | **-**  -  0.64  0.72  0.21 | **-**  -  -  -  - | **-**  -  -  -  - | **-**  -  -  -  - |
| COGNITIVE IMPAIRMENT | 131 | 7.4 | 4.4, 10 | **<0.001** | 4.7 | 1.7,7.8 | **0.003** | -  - | -  - | -  - | -  - | -  - | -  - |
| INSOMNIA | 131 | 5.1 | 2.2, 7.9 | **<0.001** | 3.2 | 0.53, 5.8 | **0.019** | 2.08 | 0.71,5.64 | 0.16 | 0.84 | 0.20, 3.14 | 0.80 |
| ANXIETY | 131 | 0.81 | 0.49, 1.1 | **<0.001** | **-** | **-** | **-** | 1.19 | 1.04,1.38 | **0.013** | 1.07 | 0.91, 1.27 | 0.40 |
| DEPRESSION | 131 | 0.30 | -0.05, 0.65 | 0.089 | **-** | **-** | **-** | 1.02 | 0.89,1.17 | 0.80 | - | - | - |
| PHYSICAL ACTIVITY  . low  . moderate  . high | 122  -  -  - | -  -  -1.4  -3.1 | -  -  -4.4, 1.6  -6.5, 0.33 | -  -  0.35  0.077 | -  -  -1.8  -2.8 | -  -  -4.3, 0.75  -5.6, 0.02 | -  -  0.17  0.052 | -  -  1.91  0.96 | -  -  0.60,7.30  0.21,4.45 | -  -  0.30  0.96 | -  -  -  - | -  -  -  - | -  -  -  - |
| MENOPAUSAL STATUS  . Premenopausal  . Postmenopausal  . Unknown | 130  -  -  - | -  -  -0.27  -1.5 | -  -  -2.8, 2.2  -6.8, 3.7 | -  -  0.83  0.56 | -  -  -  - | -  -  -  - | -  -  -  - | -  -  1.14  0.79 | -  -  0.43, 3.13  0.04, 5.34 | -  -  0.80  0.83 | -  -  -  - | -  -  -  - | -  -  -  - |
| PERIPHERAL NEUROPATHY | 131 | 8.3 | 5.4, 11 | **<0.001** | 6.7 | 3.6,9.7 | **<0.001** | - | - | - | - | - | - |
| FATIGUE | 131 | - | - | **-** | - | - | **-** | 1.37 | 1.19,1.62 | **<0.001** | 1.35 | 1.12, 1.68 | **0.003** |
| CHEMOTHERAPY : cumulative number of cycles | 131 | 0.15 | -0.16, 0.45 | 0.35 | - | - | **-** | 1.08 | 0.98, 1.20 | 0.11 | - | - | **-** |

**Table 4. Risk factors for cognition impairment in germ cell tumors patients and cancer-free women, univariate and multivariate analysis.**

| **Characteristic** | **Germ Cell Tumor patients** | | | | | | |
| --- | --- | --- | --- | --- | --- | --- | --- |
| **Univariate** | | | | **Multivariate** | | |
| N | OR | 95%CI | p | OR | 95%CI | p |
| AGE | 297 | 0.99 | 0.97, 1.02 | 0.59 | 0.97 | 0.93, 1.00 | 0.069 |
| EDUCATION LEVEL | 297 | - | - | - | - | - | - |
| Primary/Middle school | - | - | - | - | - | - | - |
| Secondary school/BAC | - | 0.69 | 0.29, 1.72 | 0.42 | 0.61 | 0.17, 2.13 | 0.43 |
| Higher education | - | 0.56 | 0.25, 1.30 | 0.17 | 0.68 | 0.23, 2.14 | 0.50 |
| POPULATION GROUPS | 297 | - | - | - | - | - | - |
| Cancer-free women | - | - | - | - | - | - | - |
| Germ cell tumors patients | - | 2.36 | 1.38, 4.03 | **0.002** | 10.2 | 2.01, 58.5 | **0.006** |
| Body Mass Index (BMI) | 296 | - | - | - | - | - | - |
| BMI<25  25≥ BMI<30  BMI≥ 30 |  | -  0.84  0.64 | 0.43, 1.59  0.26, 1.41 | 0.61  0.29 |  |  |  |
| FIGO STAGE | 99 | - | - | - | - | - | - |
| I | - | - | - | - | - | - | - |
| II | - | 1.11 | 0.20, 5.25 | 0.89 | - | - | - |
| III/IV | - | 0.93 | 0.34, 2.52 | 0.88 | - | - | - |
| Unknown | - | 1.69 | 0.57, 5.01 | 0.34 | - | - | - |
| INSOMNIA | 297 | - | - | - | - | - | - |
| No or Low | - | - | - | - | - | - | - |
| Moderate to severe | - | 6.26 | 3.55, 11.2 | **<0.001** | 1.29 | 0.59, 2.78 | 0.52 |
| ANXIETY | 296 | 1.25 | 1.15, 1.37 | **<0.001** | 1.07 | 0.96, 1.19 | 0.25 |
| DEPRESSION | 296 | 1.14 | 1.04, 1.26 | **0.006** | 1.29 | 1.09, 1.56 | **0.004** |
| PHYSICAL ACTIVITY | 291 | - | - | - | - | - | - |
| low | - | - | - | - | - | - | - |
| moderate | - | 1.61 | 0.85, 3.12 | 0.15 | - | - | - |
| high | - | 1.10 | 0.50, 2.42 | 0.81 | - | - | - |
| MENOPAUSAL STATUS | 290 | - | - | - | - | - | - |
| Premenopausal | - | - | - | - | - | - | - |
| Post menopausal | - | 1.57 | 0.72, 3.27 | 0.24 | - | - | - |
| Unkown | - | 2.09 | 0.52, 7.57 | 0.27 | - | - | - |
| FATIGUE | 297 | 1.43 | 1.31, 1.58 | **<0.001** | 1.37 | 1.23, 1.54 | **<0.001** |
| CHEMOTHERAPY : cumulative number of cycles | 297 | 1.20 | 1.06, 1.36 | **0.005** | 0.92 | 0.64, 1.30 | 0.64 |
