# Supplementary material
Source: Research Square preprint supplement (doi:10.21203/rs.3.rs-9847128/v1)
Supplement: Supplementary file 2 [file 4e33fe454258db1a93946fdd.docx]

**SUPPLEMENTAL DATA**

**Table S1.** **Detailed chemotherapy regimen for relapsed patients treated with 2 lines**

| **Patients** | **Histological Subtype** | **Chemotherapy at primary diagnosis** | **Chemotherapy for first relapse** | **Chemotherapy for second relapse** |
| --- | --- | --- | --- | --- |
| **1 : 003** | Germ cell | Bleomycine Etoposide Cisplatin or  Etoposide Cisplatin | Intensification | _ |
| **2 : 006** | Sex-cord stromal | Bleomycine Etoposide Cisplatin or  Etoposide Cisplatin | Clinical trial |  |
| **3 : 026** | Sex-cord stromal | _ | Bleomycine Etoposide Cisplatin or  Etoposide Cisplatin | Clinical trial |
| **4 : 070** | Sex-cord stromal | Bleomycine Etoposide Cisplatin or  Etoposide Cisplatin | Clinical trial | _ |
| **5 : 091** | Germ cell | Bleomycine Etoposide Cisplatin or  Etoposide Cisplatin | Bleomycine Etoposide Cisplatin or  Etoposide Cisplatin | _ |
| **6 : 130** | Sex-cord stromal | _ | BEP  or  Etoposide Cisplatin | Paclitaxel Carboplatin |
| **7 : 145** | Germ cell | Bleomycine Etoposide Cisplatin or  Etoposide Cisplatin | Vinblastin Ifosfamide Cisplatin |  |
| **8 : 173** | Sex-cord stromal | Bleomycine Etoposide Cisplatin or  Etoposide Cisplatin | Anthracyclin | _ |
| **9 : 191** | Sex-cord stromal | Bleomycine Etoposide Cisplatin or  Etoposide Cisplatin | Paclitaxel Carboplatin | _ |
| **10 : 203** | Germ cell | _ | Bleomycine Etoposide Cisplatin or  Etoposide Cisplatin | Intensification |
| **11 : 223** | Germ cell | Bleomycine Etoposide Cisplatin or  Etoposide Cisplatin | Vinblastin Ifosfamide Cisplatin | _ |
| **12 : 231** | Sex-cord stromal | Paclitaxel Carboplatin | Paclitaxel | _ |

**Table S2. Patients clinical characteristics according to menopausal status***

|  | **Post-menopausal patients**  **n = 57** | **Premenopausal patientsb**  **n =79** |
| --- | --- | --- |
| **Age at diagnosis (years)**  Median [Min, Max] | 38.6 [12.4-64.7] | 22.2 [4.8-37.9] |
| **Time since end of chemotherapy (years)**  Median [IQR] | 5.5 [2.9-8.6] | 5.7 [3.5-8.9] |
| **Histology**  - Sex-cord stromal tumor  - Germ cell tumor | 32 (56%)  25 (44%) | 12 (15%)  67 (85%) |
| **Most frequent comorbidities** a (n (%))  - Hypertension  - Diabete | 9 (16%)  6 (10%) | 2 (3%)  0 (0%) |
| **FIGO stages** (n (%))  - Stage I/II  - Stage III/IV  - Unknown | 30 (52%)  13 (23%)  14 (25%) | 41 (29%)  23 (52%)  15 (19%) |
| **SURGERY** (n (%)) |  |  |
| **Primary Surgery**  - conservative surgery  - non-conservative surgery  - no initial surgery | 31 (54%)  2 (4%)  24 (42%) | 67 (85%)  3 (4%)  9 (11%) |
| **Second surgery at relapse**  **-** conservative surgery  - non-conservative surgery  - no second surgery | 6 (11%)  18 (32%)  33 (58%) | 6 (8%)  60 (76%)  13 (16%) |
| **CHEMOTHERAPY** (n (%)) |  |  |
| **- Chemotherapy at primary diagnosis** | 40 (70%) | 71 (90 %) |
| **- Relapse treated with Chemotherapy** | 25 (45%) | 8 (11%) |
| - **Type of chemotherapy**  . Bleomycine Etoposide Cisplatin  . Other | 52 (91%)  5 (9%) | 78 (99%)  1 (1 %) |
| - **Lines of chemotherapy**  . 1 line  . 2 lines | 46 (81%)  11 (19%) | 78 (99%)  1 (1%) |

* Menopausal status determination was declarative

a- Missing: 2 in sex-cord stromal tumors patients and 1 in germ cell tumors patients

b-Patients with menopausal status “unknown” were accounted in the premenopausal subgroup.

**Figure S1. Fatigue according to insomnia and sex-cord stromal tumor or cancer-free women group**

Description of fatigue (MFI 20 mean score) in sex-cord stromal tumors patients and cancer-free women according to insomnia (Insomnia Severity Index (ISI): ISI Score 22–28 indicated severe clinical insomnia, ISI Score 15–21 indicated moderate clinical insomnia, ISI Score 8–14 indicated low clinical insomnia, ISI Score 0–7 indicated no clinically significant insomnia).
