# Supplementary material
Source: Research Square preprint supplement (doi:10.21203/rs.3.rs-9847128/v1)

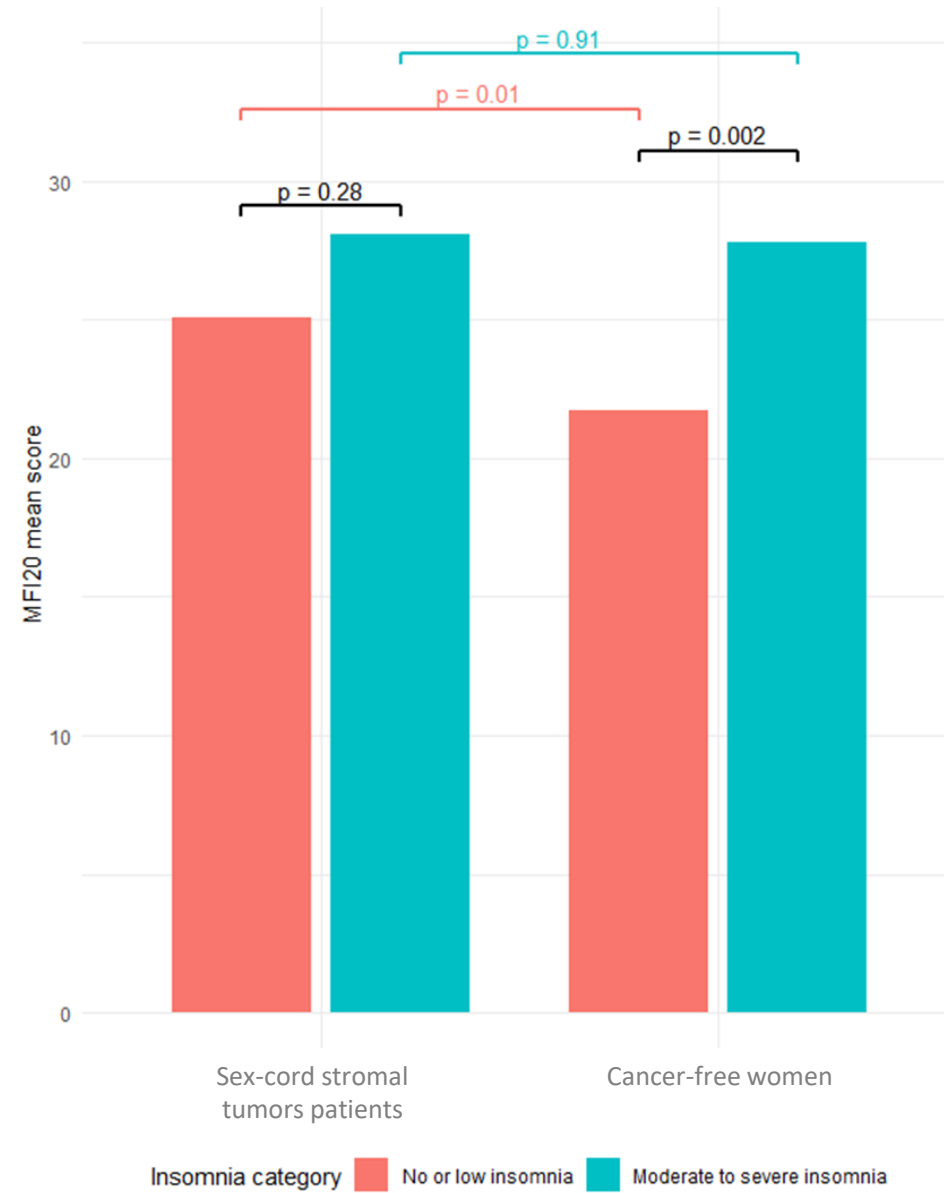

Supplement: Supplementary file 3 [file c8a527ab2992bf0d1442c110.pdf]
